# Supplementary material for: Technical field measurements of muscular workload during stocking activities in supermarkets: cross-sectional study
Source: PubMed Central journal article supplement (PMC8766430; doi:10.1038/s41598-022-04879-8), 2022-01-18
Supplement: 41598_2022_4879_MOESM1_ESM.pdf [file 41598_2022_4879_MOESM1_ESM.pdf]

Title: Technical field measurements of muscular workload during stocking activities in supermarkets: cross-sectional study

Author list: Sebastian Venge Skovlund, MSc, PhD stipendiate, Rúni Bláfoss, MSc, PhD stipendiate, Sebastian Skals, PhD, Markus Due Jakobsen, PhD, Lars Louis Andersen, PhD

**Supplementary Table 1. Full participant characteristics.**

|                                                            | Whole cohort |      |      |    | Chain A |      |     |    | Chain B |      |     |   | Chain C |      |     |   | Chain D |      |      |    | Chain E |      |      |    |
|------------------------------------------------------------|--------------|------|------|----|---------|------|-----|----|---------|------|-----|---|---------|------|-----|---|---------|------|------|----|---------|------|------|----|
|                                                            | n            | Mean | SD   | %  | n       | Mean | SD  | %  | n       | Mean | SD  | % | n       | Mean | SD  | % | n       | Mean | SD   | %  | n       | Mean | SD   | %  |
| Age (years)                                                | 75           | 30   | 12   |    | 16      | 35   | 15  |    | 13      | 23   | 4   |   | 16      | 28   | 9   |   | 15      | 27   | 10   |    | 15      | 37   | 14   |    |
| Gender                                                     | 75           |      |      |    | 16      |      |     |    | 13      |      |     |   | 16      |      |     |   | 15      |      |      |    | 15      |      |      |    |
| Women                                                      |              |      |      | 37 |         |      |     | 63 |         |      | 8   |   |         |      | 38  |   |         |      |      | 33 |         |      |      |    |
| Men                                                        |              |      |      | 63 |         |      |     | 38 |         |      | 92  |   |         |      | 63  |   |         |      |      | 67 |         |      |      |    |
| Height (cm)                                                | 67           | 175  | 10   |    | 14      | 172  | 10  |    | 10      | 181  | 10  |   | 16      | 174  | 9   |   | 14      | 178  | 10   |    | 13      | 175  | 12   |    |
| Weight (kg)                                                | 67           | 76   | 16   |    | 14      | 72   | 15  |    | 10      | 80   | 11  |   | 16      | 72   | 14  |   | 14      | 77   | 16   |    | 13      | 79   | 20   |    |
| Work experience within MMH                                 |              | 9.7  | 10.0 |    | 14      | 12.4 | 8.5 |    | 10      | 7.1  | 3.3 |   | 16      | 6.6  | 7.1 |   | 14      | 8.0  | 11.3 |    | 13      | 14.5 | 14.3 |    |
| Smoking                                                    | 67           |      |      |    | 14      |      |     |    | 10      |      |     |   | 16      |      |     |   | 14      |      |      |    | 13      |      |      |    |
| Yes, daily                                                 |              |      |      | 31 |         |      |     | 36 |         |      | 10  |   |         |      | 50  |   |         |      |      | 7  |         |      |      | 46 |
| Yes, now and then                                          |              |      |      | 9  |         |      |     | 7  |         |      | 20  |   |         | 6    |     |   |         |      |      | 7  |         |      |      | 8  |
| Ex-smoker                                                  |              |      |      | 18 |         |      |     | 14 |         |      | 40  |   |         | 13   |     |   |         |      |      | 21 |         |      |      | 8  |
| No, never                                                  |              |      |      | 42 |         |      |     | 43 |         |      | 30  |   |         | 31   |     |   |         |      |      | 64 |         |      |      | 38 |
| Physical activity during leisure (%)                       | 67           |      |      |    | 14      |      |     |    | 10      |      |     |   | 16      |      |     |   | 14      |      |      |    | 13      |      |      |    |
| Mostly sedentary                                           |              |      |      | 18 |         |      |     | 29 |         |      | 0   |   |         |      | 19  |   |         |      |      | 14 |         |      |      | 23 |
| Light exercise at least 4 h                                |              |      |      | 51 |         |      |     | 57 |         |      | 30  |   |         |      | 44  |   |         |      |      | 43 |         |      |      | 77 |
| Sports or heavy physical activity at least 4 h per week    |              |      |      | 18 |         |      |     | 7  |         |      | 40  |   |         |      | 25  |   |         |      |      | 21 |         |      |      |    |
| Training and competing regularly and several times a week  |              |      |      | 13 |         |      |     | 7  |         |      | 30  |   |         |      | 13  |   |         |      |      | 21 |         |      |      |    |
| <b>Work factors</b>                                        |              |      |      |    |         |      |     |    |         |      |     |   |         |      |     |   |         |      |      |    |         |      |      |    |
| Busyness during typical/standard week (0-10)               | 67           | 6.7  | 1.7  |    | 14      | 6.6  | 1.8 |    | 10      | 6.2  | 1.5 |   | 16      | 7.4  | 1.3 |   | 14      | 6.0  | 2.1  |    | 13      | 6.9  | 1.5  |    |
| Physical exertion during lift of milk box (0-10, 15 steps) | 67           | 5.8  | 3.1  |    | 14      | 5.3  | 2.3 |    | 10      | 4.9  | 2.7 |   | 16      | 6.9  | 3.1 |   | 14      | 6.9  | 3.6  |    | 13      | 4.2  | 2.9  |    |
| Physical exhaustion after typical workday (0-10)           | 67           |      |      |    | 14      |      |     |    | 10      |      |     |   | 16      |      |     |   | 14      |      |      |    | 13      |      |      |    |
| Not exhausted                                              |              |      |      | 3  |         |      |     | 0  |         |      | 0   |   |         |      | 6   |   |         |      |      |    |         |      |      | 8  |
| A bit exhausted                                            |              |      |      | 28 |         |      |     | 29 |         |      | 40  |   |         |      | 13  |   |         |      |      | 36 |         |      |      | 31 |

|                                                |    |    |    |    |    |    |    |
|------------------------------------------------|----|----|----|----|----|----|----|
| Somewhat exhausted                             |    | 40 | 43 | 50 | 38 | 36 | 38 |
| Very exhausted                                 |    | 25 | 21 | 10 | 44 | 21 | 23 |
| Completely exhausted                           |    | 3  | 7  | 0  | 0  | 7  | 0  |
| Mental exhaustion after typical workday (0-10) | 67 | 14 | 10 | 16 | 14 | 13 |    |
| Not exhausted                                  |    | 3  | 7  |    |    |    | 8  |
| A bit exhausted                                |    | 25 | 14 | 40 | 13 | 43 | 23 |
| Somewhat exhausted                             |    | 39 | 29 | 40 | 44 | 36 | 46 |
| Very exhausted                                 |    | 24 | 43 | 10 | 38 | 14 | 8  |
| Completely exhausted                           |    | 9  | 7  | 10 | 6  | 7  | 15 |
| Well-rested the morning after a workday        | 67 | 14 | 10 | 16 | 14 | 13 |    |
| Almost always                                  |    | 16 | 14 | 20 | 0  | 21 | 31 |
| Often                                          |    | 16 | 14 | 20 | 13 | 14 | 23 |
| Sometimes                                      |    | 46 | 57 | 40 | 69 | 36 | 23 |
| Seldomly                                       |    | 18 | 7  | 10 | 19 | 29 | 23 |
| Never                                          |    | 3  | 7  | 10 | 0  | 0  | 0  |
| Physical work ability                          | 67 | 14 | 10 | 16 | 14 | 13 |    |
| Very good                                      |    | 39 | 21 | 70 | 50 | 21 | 38 |
| Good                                           |    | 48 | 64 | 20 | 38 | 71 | 38 |
| Fair                                           |    | 13 | 14 | 10 | 13 | 7  | 23 |
| Poor                                           |    | 0  | 0  | 0  | 0  | 0  | 0  |
| Very poor                                      |    | 0  | 0  | 0  | 0  | 0  | 0  |
| Stressed during the past two weeks             | 67 | 14 | 10 | 16 | 14 | 13 |    |
| Always                                         |    | 1  | 0  | 10 | 0  | 0  | 0  |
| Often                                          |    | 25 | 36 | 10 | 31 | 36 | 8  |
| Sometimes                                      |    | 40 | 50 | 40 | 44 | 43 | 23 |
| Seldomly                                       |    | 22 | 14 | 30 | 19 | 14 | 38 |
| Never                                          |    | 10 | 0  | 10 | 6  | 7  | 31 |
| Contradictory demands                          | 67 | 14 | 10 | 16 | 14 | 13 |    |
| Always                                         |    | 3  | 7  | 0  | 0  | 0  | 8  |
| Often                                          |    | 9  | 7  | 0  | 13 | 21 | 15 |
| Sometimes                                      |    | 31 | 29 | 40 | 44 | 29 | 31 |
| Seldomly                                       |    | 43 | 50 | 50 | 44 | 43 | 46 |

|                                              |    |    |    |    |    |    |    |
|----------------------------------------------|----|----|----|----|----|----|----|
| Never                                        |    | 13 | 7  | 10 | 0  | 7  |    |
| Job role certainty                           | 67 | 14 | 10 | 16 | 14 | 13 |    |
| Always                                       |    | 51 | 50 | 50 | 44 | 43 | 69 |
| Often                                        |    | 40 | 36 | 50 | 44 | 50 | 23 |
| Sometimes                                    |    | 7  | 14 | 0  | 13 | 0  | 8  |
| Seldomly                                     |    | 1  | 0  | 0  |    | 7  | 0  |
| Never                                        |    | 0  | 0  | 0  | 0  | 0  | 0  |
| Emotional distress during work               | 67 | 14 | 10 | 16 | 14 | 13 |    |
| Always                                       |    | 0  | 0  | 0  | 0  | 0  | 0  |
| Often                                        |    | 13 | 14 | 10 | 19 | 14 | 8  |
| Sometimes                                    |    | 28 | 43 | 10 | 38 | 21 | 23 |
| Seldomly                                     |    | 34 | 36 | 40 | 25 | 50 | 23 |
| Never                                        |    | 24 | 7  | 40 | 19 | 14 | 46 |
| Influence at work                            | 67 | 14 | 10 | 16 | 14 | 13 |    |
| Always                                       |    | 19 | 21 | 10 | 25 | 14 | 23 |
| Often                                        |    | 39 | 29 | 30 | 31 | 64 | 38 |
| Sometimes                                    |    | 24 | 29 | 20 | 25 | 14 | 31 |
| Seldomly                                     |    | 15 | 21 | 30 | 19 | 7  | 0  |
| Never                                        |    | 3  | 0  | 10 | 0  | 0  | 8  |
| Need for very fast work                      | 67 | 14 | 10 | 16 | 14 | 13 |    |
| Always                                       |    | 30 | 21 | 20 | 31 | 29 | 46 |
| Often                                        |    | 46 | 50 | 50 | 50 | 50 | 31 |
| Sometimes                                    |    | 19 | 29 | 20 | 19 | 21 | 8  |
| Seldomly                                     |    | 4  | 0  | 10 | 0  | 0  | 15 |
| Never                                        |    | 0  | 0  | 0  | 0  | 0  | 0  |
| Belonging to work community                  | 67 | 14 | 10 | 16 | 14 | 13 |    |
| Always                                       |    | 67 | 64 | 90 | 69 | 43 | 77 |
| Often                                        |    | 25 | 29 | 10 | 25 | 43 | 15 |
| Sometimes                                    |    | 4  | 0  | 0  | 6  | 14 | 0  |
| Seldomly                                     |    | 1  | 0  | 0  | 0  | 0  | 8  |
| Never                                        |    | 1  | 7  | 0  | 0  | 0  | 0  |
| Superior's willingness to listen to problems | 67 | 14 | 10 | 16 | 14 | 13 |    |

|                                                             |    |     |     |    |     |     |    |     |     |    |     |     |    |     |     |  |     |     |
|-------------------------------------------------------------|----|-----|-----|----|-----|-----|----|-----|-----|----|-----|-----|----|-----|-----|--|-----|-----|
| Always                                                      |    |     | 52  |    | 57  |     | 30 |     | 50  |    | 43  |     | 77 |     |     |  |     |     |
| Often                                                       |    |     | 30  |    | 21  |     | 40 |     | 31  |    | 36  |     | 23 |     |     |  |     |     |
| Sometimes                                                   |    |     | 12  |    | 14  |     | 20 |     | 13  |    | 14  |     | 0  |     |     |  |     |     |
| Seldomly                                                    |    |     | 6   |    | 7   |     | 10 |     | 6   |    | 7   |     | 0  |     |     |  |     |     |
| Never                                                       |    |     | 0   |    | 0   |     | 0  |     | 0   |    | 0   |     | 0  |     |     |  |     |     |
| Pain intensity during the last week (0-10)                  | 67 |     |     | 14 |     | 10  |    | 16  |     | 14 |     | 13  |    |     |     |  |     |     |
| Headache                                                    |    | 2.4 | 2.5 |    | 1.6 | 2.1 |    | 1.9 | 2.3 |    | 3.0 | 2.6 |    | 2.9 | 2.6 |  | 2.5 | 3.1 |
| Neck                                                        |    | 2.3 | 2.4 |    | 1.9 | 2.2 |    | 1.3 | 1.4 |    | 2.0 | 1.9 |    | 3.0 | 2.5 |  | 2.9 | 3.2 |
| Shoulders                                                   |    | 2.5 | 2.5 |    | 1.9 | 2.2 |    | 1.6 | 2.0 |    | 2.2 | 2.3 |    | 3.6 | 2.4 |  | 3.0 | 3.1 |
| Upper back                                                  |    | 2.1 | 2.3 |    | 1.4 | 2.1 |    | 1.0 | 1.2 |    | 2.4 | 2.0 |    | 3.1 | 2.3 |  | 2.5 | 3.2 |
| Low-back                                                    |    | 3.4 | 2.6 |    | 3.3 | 2.2 |    | 2.4 | 2.4 |    | 3.4 | 2.8 |    | 4.3 | 2.5 |  | 3.2 | 3.0 |
| Elbows                                                      |    | 0.6 | 1.5 |    | 0.1 | 0.5 |    | 0.4 | 1.0 |    | 0.6 | 1.5 |    | 1.1 | 1.7 |  | 0.8 | 2.0 |
| Hands/wrists                                                |    | 1.9 | 2.4 |    | 1.1 | 1.7 |    | 1.0 | 1.8 |    | 3.0 | 3.0 |    | 2.6 | 2.5 |  | 1.2 | 2.3 |
| Hips                                                        |    | 1.3 | 2.3 |    | 0.2 | 0.6 |    | 0.7 | 1.6 |    | 1.4 | 2.3 |    | 2.4 | 2.7 |  | 1.5 | 2.9 |
| Knees                                                       |    | 1.9 | 2.4 |    | 1.4 | 1.8 |    | 1.5 | 1.5 |    | 2.3 | 2.5 |    | 2.6 | 2.9 |  | 1.5 | 2.9 |
| Feet/ankles                                                 |    | 2.4 | 2.6 |    | 3.4 | 3.0 |    | 1.0 | 1.3 |    | 2.1 | 2.4 |    | 3.7 | 2.6 |  | 1.5 | 2.2 |
| Chronic musculoskeletal pain $\geq 3$ months duration (Yes) | 67 |     |     | 14 |     | 10  |    | 16  |     | 14 |     | 13  |    |     |     |  |     |     |
| Headache                                                    |    |     |     | 18 |     | 21  |    | 10  |     | 19 |     | 14  |    | 23  |     |  |     |     |
| Neck                                                        |    |     |     | 18 |     | 21  |    | 0   |     | 6  |     | 21  |    | 38  |     |  |     |     |
| Shoulders                                                   |    |     |     | 19 |     | 21  |    | 10  |     | 19 |     | 14  |    | 31  |     |  |     |     |
| Upper back                                                  |    |     |     | 18 |     | 14  |    | 10  |     | 25 |     | 14  |    | 23  |     |  |     |     |
| Low-back                                                    |    |     |     | 27 |     | 36  |    | 30  |     | 19 |     | 21  |    | 31  |     |  |     |     |
| Elbows                                                      |    |     |     | 3  |     | 0   |    | 0   |     | 6  |     | 0   |    | 8   |     |  |     |     |
| Hands/wrists                                                |    |     |     | 18 |     | 0   |    | 10  |     | 38 |     | 21  |    | 15  |     |  |     |     |
| Hips                                                        |    |     |     | 16 |     | 7   |    | 10  |     | 13 |     | 36  |    | 15  |     |  |     |     |
| Knees                                                       |    |     |     | 25 |     | 14  |    | 30  |     | 31 |     | 29  |    | 23  |     |  |     |     |
| Feet/ankles                                                 |    |     |     | 30 |     | 43  |    | 10  |     | 31 |     | 29  |    | 31  |     |  |     |     |
| MSD-related sickness absence the past year                  | 67 |     |     | 14 |     | 10  |    | 16  |     | 14 |     | 13  |    |     |     |  |     |     |
| No                                                          |    |     |     | 88 |     | 79  |    | 90  |     | 88 |     | 100 |    | 85  |     |  |     |     |
| Yes, one workday                                            |    |     |     | 4  |     | 14  |    | 10  |     | 0  |     | 0   |    | 0   |     |  |     |     |
| Yes, two to five workdays                                   |    |     |     | 6  |     | 0   |    | 0   |     | 13 |     | 0   |    | 15  |     |  |     |     |

|                                                    |    |     |     |   |    |     |     |   |    |     |     |  |    |     |     |  |      |     |     |   |    |     |     |
|----------------------------------------------------|----|-----|-----|---|----|-----|-----|---|----|-----|-----|--|----|-----|-----|--|------|-----|-----|---|----|-----|-----|
| Yes, more than 10 workdays                         |    |     |     | 1 |    |     |     | 7 |    |     |     |  |    |     |     |  |      |     |     | 0 |    |     |     |
| MSD-interference on work (0-10)                    | 67 | 2.9 | 2.9 |   | 14 | 3.5 | 3.1 |   | 10 | 1.5 | 2.1 |  | 16 | 3.3 | 3.1 |  | 14.0 | 3.4 | 2.4 |   | 13 | 2.0 | 3.4 |
| MSD-interference on leisure-time activities (0-10) | 67 | 2.9 | 3.3 |   | 14 | 3.0 | 3.4 |   | 10 | 2.2 | 3.1 |  | 16 | 3.3 | 3.3 |  | 14.0 | 3.3 | 3.2 |   | 13 | 2.5 | 3.8 |
| General health status                              | 67 |     |     |   | 14 |     |     |   | 10 |     |     |  | 16 |     |     |  |      |     |     |   | 13 |     |     |
| Excellent                                          |    |     |     |   | 13 |     |     |   | 7  |     |     |  | 40 |     |     |  |      |     |     |   | 7  |     | 23  |
| Quite good                                         |    |     |     |   | 42 |     |     |   | 43 |     |     |  | 50 |     |     |  |      |     |     |   | 29 |     | 38  |
| Good                                               |    |     |     |   | 37 |     |     |   | 50 |     |     |  | 10 |     |     |  |      |     |     |   | 50 |     | 31  |
| Not good                                           |    |     |     |   | 7  |     |     |   | 0  |     |     |  | 0  |     |     |  |      |     |     |   | 14 |     | 8   |
| Poor                                               |    |     |     |   | 0  |     |     |   | 0  |     |     |  | 0  |     |     |  |      |     |     |   | 0  |     | 0   |

## Supplementary Table 2.

Department-specific neck/shoulder and low-back peak muscular workload estimates per chain presented as least square means (LSM) with 95% confidence intervals of the 95th percentile rank of nRMS (% nRMS (95% CI)). Significant differences ( $p < 0.05$ ) between conditions are indicated with numbers in superscript.

| Neck/shoulder          |                  |  | Low-back               |                                     |
|------------------------|------------------|--|------------------------|-------------------------------------|
| B                      |                  |  | B                      |                                     |
| Chain E <sup>(1)</sup> | 18.3 (15.9-20.7) |  | Chain B <sup>(1)</sup> | 20.9 (17.3-24.6) <sup>(3,4,5)</sup> |
| Chain A <sup>(2)</sup> | 19.2 (16.9-21.4) |  | Chain A <sup>(2)</sup> | 21.0 (17.9-24.1) <sup>(3,4,5)</sup> |
| Chain C <sup>(3)</sup> | 19.2 (17.0-21.4) |  | Chain D <sup>(3)</sup> | 26.7 (23.6-29.8) <sup>(1,2)</sup>   |
| Chain B <sup>(4)</sup> | 19.6 (17.0-22.3) |  | Chain E <sup>(4)</sup> | 26.8 (23.5-30.0) <sup>(1,2)</sup>   |
| Chain D <sup>(5)</sup> | 19.8 (17.5-22.1) |  | Chain C <sup>(5)</sup> | 27.3 (24.2-30.3) <sup>(1,2)</sup>   |
| FV                     |                  |  | FV                     |                                     |

|                        |                                   |  |                        |                                     |
|------------------------|-----------------------------------|--|------------------------|-------------------------------------|
| Chain E <sup>(1)</sup> | 19.7 (17.3-22.1) <sup>(4,5)</sup> |  | Chain B <sup>(1)</sup> | 23.4 (19.8-27.1) <sup>(4,5)</sup>   |
| Chain A <sup>(2)</sup> | 20.6 (18.3-22.8)                  |  | Chain A <sup>(2)</sup> | 23.6 (20.5-26.6) <sup>(3,4,5)</sup> |
| Chain D <sup>(3)</sup> | 20.6 (18.3-22.9)                  |  | Chain E <sup>(3)</sup> | 28.1 (24.8-31.3) <sup>(2)</sup>     |
| Chain C <sup>(4)</sup> | 23.6 (21.5-25.8) <sup>(1)</sup>   |  | Chain D <sup>(4)</sup> | 29.0 (25.8-32.1) <sup>(1,2)</sup>   |
| Chain B <sup>(5)</sup> | 23.6 (21.0-26.3) <sup>(1)</sup>   |  | Chain C <sup>(5)</sup> | 31.9 (28.9-34.9) <sup>(1,2)</sup>   |
| <b>F</b>               |                                   |  |                        |                                     |
| Chain E <sup>(1)</sup> | 16.4 (14.0-18.8) <sup>(5)</sup>   |  | Chain B <sup>(1)</sup> | 19.7 (16.1-23.4) <sup>(5)</sup>     |
| Chain C <sup>(2)</sup> | 16.6 (14.4-18.8) <sup>(5)</sup>   |  | Chain A <sup>(2)</sup> | 21.2 (18.1-24.2)                    |
| Chain B <sup>(3)</sup> | 17.4 (14.7-20.0)                  |  | Chain E <sup>(3)</sup> | 23.0 (19.7-26.2)                    |
| Chain D <sup>(4)</sup> | 17.8 (15.4-20.1)                  |  | Chain C <sup>(4)</sup> | 23.4 (20.4-26.5)                    |
| Chain A <sup>(5)</sup> | 20.5 (18.2-22.7) <sup>(1,2)</sup> |  | Chain D <sup>(5)</sup> | 24.5 (21.3-27.6) <sup>(1)</sup>     |
| <b>M</b>               |                                   |  |                        |                                     |
| Chain E <sup>(1)</sup> | 16.6 (14.3-19.0)                  |  | Chain B <sup>(2)</sup> | 19.5 (15.8-23.2) <sup>(4,5)</sup>   |
| Chain B <sup>(2)</sup> | 16.8 (14.2-19.5)                  |  | Chain A <sup>(1)</sup> | 19.9 (16.9-23.0) <sup>(4,5)</sup>   |
| Chain A <sup>(3)</sup> | 17.7 (15.5-20.0)                  |  | Chain E <sup>(3)</sup> | 22.3 (19.1-25.5)                    |
| Chain C <sup>(4)</sup> | 18.1 (15.9-20.3)                  |  | Chain C <sup>(4)</sup> | 24.3 (21.3-27.4) <sup>(1,2)</sup>   |
| Chain D <sup>(5)</sup> | 18.2 (15.9-20.5)                  |  | Chain D <sup>(5)</sup> | 24.9 (21.8-28.1) <sup>(1,2)</sup>   |
| <b>C</b>               |                                   |  |                        |                                     |
| Chain B <sup>(1)</sup> | 17.7 (15.1-20.4) <sup>(5)</sup>   |  | Chain A <sup>(1)</sup> | 19.6 (16.5-22.6) <sup>(4,5)</sup>   |
| Chain C <sup>(2)</sup> | 18.9 (16.7-21.1)                  |  | Chain B <sup>(2)</sup> | 21.0 (17.3-24.7)                    |
| Chain A <sup>(3)</sup> | 19.7 (17.4-21.9)                  |  | Chain C <sup>(3)</sup> | 21.9 (18.9-25.0)                    |
| Chain D <sup>(4)</sup> | 19.9 (17.6-22.2)                  |  | Chain D <sup>(4)</sup> | 24.4 (21.3-27.6) <sup>(1)</sup>     |

|                        |                                 |  |                        |                                 |
|------------------------|---------------------------------|--|------------------------|---------------------------------|
| Chain E <sup>(5)</sup> | 22.0 (19.7-24.4) <sup>(1)</sup> |  | Chain E <sup>(5)</sup> | 24.4 (21.2-27.7) <sup>(1)</sup> |
| <b>D</b>               |                                 |  | <b>D</b>               |                                 |
| Chain D <sup>(1)</sup> | 20.0 (17.8-22.3)                |  | Chain A <sup>(1)</sup> | 23.1 (20.1-26.2)                |
| Chain E <sup>(2)</sup> | 20.1 (17.8-22.5)                |  | Chain B <sup>(2)</sup> | 24.0 (20.4-27.7)                |
| Chain B <sup>(3)</sup> | 21.2 (18.6-23.9)                |  | Chain E <sup>(3)</sup> | 24.8 (21.6-28.1)                |
| Chain C <sup>(4)</sup> | 21.8 (19.6-24.0)                |  | Chain D <sup>(4)</sup> | 26.2 (23.1-29.3)                |
| Chain A <sup>(5)</sup> | 22.9 (20.6-25.1)                |  | Chain C <sup>(5)</sup> | 27.4 (24.3-30.4)                |
